# Supplementary material for: Comparison of C. elegans and C. briggsae Genome Sequences Reveals Extensive Conservation of Chromosome Organization and Synteny
Source: PLoS Biol. 2007 Jul 3;5(7):e167. doi: 10.1371/journal.pbio.0050167 (PMC1914384; doi:10.1371/journal.pbio.0050167)
Supplement: Dataset S3 — The representation of various features is given in 500-kb windows in 100-kb steps across each chromosome. Features include the percentage of the sequence in the window that is intronic, the percentage that is exonic, and the percentage that is repetitive. Also shown are the percentage of exons in orthologs and the number of telomere repeat sequences in each 500-kb window. (105 KB XLS) [file pbio.0050167.sd003.xls]

## Sheet: Sheet1
C. briggsae Chromosomal Features per 500kb window in steps of 100kb
Chromosome	Position (Mb)	Intron	Repeat	Telomere	Exon	Ortholog		ortholog=number of exons of 1:1 orthologs in the 500kb window as the numerator and number ot total exons in the 500kb window as the denominator
CbI	0	36.9	26.3	1279	25.8	46		exon=%age of bp in exon per 500kb window
CbI	0.1	35.5	26.4	1278	27.1	45		telomere=number of telomere repeats in the 500kb window
CbI	0.2	32.1	26.4	1347	23.5	45		repeat=%age of bp in repeat per 500kb window
CbI	0.3	34.6	28.9	1204	22.7	43		intron=%age of bp in intron per 500kb window
CbI	0.4	37.8	33.1	1242	20	43
CbI	0.5	39.9	34.1	1296	18.1	46
CbI	0.6	39	33.5	1238	17	48
CbI	0.7	37.5	33.1	1103	17.1	48
CbI	0.8	36.8	30.3	1238	18.2	45
CbI	0.9	33.7	28.6	1253	16.9	44
CbI	1	31.9	27.5	1319	18.4	48
CbI	1.1	37.3	28.4	1319	17.4	48
CbI	1.2	39.9	26	1442	17.5	50
CbI	1.3	36.4	26	1386	15.5	53
CbI	1.4	42.3	26.8	1361	16.5	58
CbI	1.5	42	27.3	1321	16.9	56
CbI	1.6	39.4	26.6	1389	19.5	53
CbI	1.7	38.1	27.6	1366	21.4	58
CbI	1.8	40.5	25.3	1405	22.2	56
CbI	1.9	37	22.9	1351	23.3	51
CbI	2	39	21.5	1309	24.3	57
CbI	2.1	38.1	20.2	1228	25.3	60
CbI	2.2	37.6	20.5	1126	25.6	58
CbI	2.3	36	19.8	1108	27.9	53
CbI	2.4	35.2	21.2	1108	27.2	57
CbI	2.5	32.6	19.7	1036	29.3	59
CbI	2.6	30	18.4	980	33.2	56
CbI	2.7	28.3	16.1	922	35.5	56
CbI	2.8	25	15.7	813	35.9	62
CbI	2.9	21.4	13.9	748	39.1	60
CbI	3	21.1	13.6	736	37.7	56
CbI	3.1	19.8	15.2	769	31.4	59
CbI	3.2	20.3	15.4	786	30	64
CbI	3.3	21.8	15.1	794	29.9	67
CbI	3.4	23.8	14.4	822	27.6	69
CbI	3.5	21.7	14.4	788	28.9	67
CbI	3.6	23.6	12.6	748	31.4	59
CbI	3.7	23.8	12.5	736	29.7	58
CbI	3.8	25.4	13.2	755	27.9	58
CbI	3.9	24.4	12.5	728	30.6	54
CbI	4	24.9	13.6	766	28.9	56
CbI	4.1	23.3	13.3	769	31.1	66
CbI	4.2	22.9	12.9	775	34.6	69
CbI	4.3	20.2	12.4	719	37.4	70
CbI	4.4	21.4	12.9	722	35.1	77
CbI	4.5	23.4	12.9	727	36.8	67
CbI	4.6	26.1	12.2	724	33	62
CbI	4.7	26.4	11.9	701	32.8	62
CbI	4.8	28.4	12.3	784	30.1	60
CbI	4.9	27.8	11.7	784	32.5	61
CbI	5	27.4	11.1	746	31.3	73
CbI	5.1	26.5	13.1	759	34.1	77
CbI	5.2	27.4	14	786	33.9	78
CbI	5.3	25.5	14.5	739	34.8	82
CbI	5.4	24.8	16.1	742	34.4	77
CbI	5.5	22.9	17	748	34.6	71
CbI	5.6	21.8	15.8	734	35.1	74
CbI	5.7	20.4	15.1	716	35	70
CbI	5.8	22.5	14.3	701	37.6	67
CbI	5.9	22.9	14.6	672	38.2	67
CbI	6	23.9	13.2	719	37	68
CbI	6.1	23.1	12.9	732	36.7	63
CbI	6.2	23.4	13.3	691	36.4	61
CbI	6.3	21.8	14.7	689	34.3	58
CbI	6.4	22.6	15.8	716	30.9	57
CbI	6.5	24.7	15.9	701	30.2	57
CbI	6.6	26.8	17.2	729	27.4	56
CbI	6.7	26.5	17	785	27.2	60
CbI	6.8	26.3	16.4	784	28.6	65
CbI	6.9	26.7	14.8	787	30.2	67
CbI	7	25.1	15.9	792	32.3	66
CbI	7.1	24	15.3	789	33.3	68
CbI	7.2	23.7	15.5	776	33	68
CbI	7.3	24.8	15.5	839	32.8	67
CbI	7.4	24.4	14.4	831	33.6	67
CbI	7.5	23.5	14.4	841	30.3	68
CbI	7.6	24	15.9	836	28.9	67
CbI	7.7	24.3	15.6	832	27.4	67
CbI	7.8	23.5	16	783	26.2	62
CbI	7.9	24.7	18.2	821	25.2	58
CbI	8	28.2	19.6	822	25.6	56
CbI	8.1	29.3	18.9	844	24.9	54
CbI	8.2	29.3	20	878	24.1	52
CbI	8.3	33.5	21.3	909	23.1	54
CbI	8.4	32.6	21.5	921	21	55
CbI	8.5	29.1	22.6	927	21.5	49
CbI	8.6	30.2	23.9	925	22.1	47
CbI	8.7	31.7	26	914	22.5	37
CbI	8.8	27.6	24.4	911	24.4	26
CbI	8.9	28.9	24.3	948	23.7	30
CbI	9	30.8	23.3	946	23.2	32
CbI	9.1	30.5	23.1	998	25	33
CbI	9.2	32.3	22.5	1072	25.1	50
CbI	9.3	33.6	25.8	1201	22.4	55
CbI	9.4	34.2	28.1	1144	22.3	51
CbI	9.5	34.6	28	1253	23.7	43
CbI	9.6	36.9	29.5	1374	22.9	37
CbI	9.7	38	30.3	1367	21	27
CbI	9.8	38.2	29.1	1384	20.8	23
CbI	9.9	36.6	31.6	1710	19.6	22
CbI	10	35	30.2	1667	18.7	40
CbI	10.1	32.2	25.5	1478	21.1	51
CbI	10.2	29.5	23.5	1464	20.1	52
CbI	10.3	29.7	21.9	1375	22	62
CbI	10.4	32.9	17.5	1089	26.5	66
CbI	10.5	36.1	21.6	1122	26.9	63
CbI	10.6	36.9	24.4	1249	24.1	71
CbI	10.7	39.1	25.2	1253	27.7	75
CbII	0	24.2	17.5	939	27.1	72
CbII	0.1	27.9	21.4	1079	24.5	70
CbII	0.2	30.9	26.9	1148	21.8	69
CbII	0.3	34.8	31.2	1233	19.7	73
CbII	0.4	37.7	33.7	1287	18.7	67
CbII	0.5	38.5	35.2	1331	17.7	62
CbII	0.6	40.9	35.9	1347	16.9	56
CbII	0.7	42.2	35.7	1332	16.1	50
CbII	0.8	39.8	35	1267	15.5	39
CbII	0.9	45	34.2	1245	16.1	36
CbII	1	48.1	34.7	1240	15.5	39
CbII	1.1	44.9	34.5	1300	15.2	41
CbII	1.2	43.7	33.8	1373	16.4	50
CbII	1.3	45.2	33.3	1488	18.3	45
CbII	1.4	38.7	31.1	1443	18.5	38
CbII	1.5	34.9	26.7	1339	23	23
CbII	1.6	33.9	26.5	1195	24	19
CbII	1.7	34.9	25.5	1183	23.5	20
CbII	1.8	36.8	24.2	1090	22.6	24
CbII	1.9	38.7	25.6	1135	22	35
CbII	2	38.4	29.1	1143	18.7	52
CbII	2.1	39	27.4	1296	18.6	52
CbII	2.2	36.7	27.2	1195	19.7	46
CbII	2.3	32.7	28.8	1137	20.9	46
CbII	2.4	32.9	29.1	1067	23.3	49
CbII	2.5	30.8	27.4	1062	22.9	44
CbII	2.6	28.9	27	865	26.4	53
CbII	2.7	29.3	26.3	879	27.5	61
CbII	2.8	28.4	25.8	913	28.1	70
CbII	2.9	26.9	24.3	904	26.1	74
CbII	3	29.2	24.8	863	27.1	79
CbII	3.1	29.6	24.9	851	26.5	74
CbII	3.2	28.6	24.4	857	24.7	68
CbII	3.3	28.4	22.4	830	23.2	62
CbII	3.4	28.9	20.2	803	25.5	44
CbII	3.5	29.7	19.4	884	26.3	44
CbII	3.6	30.2	19.7	945	24.2	43
CbII	3.7	31.7	21	957	25.5	44
CbII	3.8	31.4	22.1	998	25.6	40
CbII	3.9	32.2	24.5	1052	22.3	53
CbII	4	33.2	24	1039	23.3	54
CbII	4.1	32.8	23.3	1001	25.5	53
CbII	4.2	33.2	23	1015	25	54
CbII	4.3	33.2	25.1	1002	26	51
CbII	4.4	34.3	26.2	989	26.7	56
CbII	4.5	33.5	26.8	957	25.6	60
CbII	4.6	37.2	28	977	24.4	65
CbII	4.7	35.5	26.8	917	26.4	66
CbII	4.8	37.3	24.4	886	27.8	71
CbII	4.9	32.9	22.2	885	28.1	64
CbII	5	29.2	19.4	828	32.9	57
CbII	5.1	25.3	16.1	787	33.2	58
CbII	5.2	24.8	15.5	796	31.7	57
CbII	5.3	22.7	14.1	794	32.4	62
CbII	5.4	22.9	15	740	31.9	65
CbII	5.5	23.3	16.4	768	25.3	68
CbII	5.6	23.8	17.5	747	26.5	66
CbII	5.7	23.5	16.4	744	26.7	73
CbII	5.8	23.1	16.6	771	24.3	73
CbII	5.9	23.6	14.5	788	26.5	78
CbII	6	25.1	14.6	792	29.6	83
CbII	6.1	25.5	14.6	810	26.9	80
CbII	6.2	25.6	15.9	787	26.1	71
CbII	6.3	25.6	15.2	749	27	71
CbII	6.4	26.4	14.6	769	27.3	70
CbII	6.5	27.6	13.8	748	27.8	68
CbII	6.6	25.9	13.6	753	28.6	70
CbII	6.7	26.4	12.3	777	29.3	76
CbII	6.8	27.4	13	793	28	78
CbII	6.9	27.5	12.6	764	27.5	75
CbII	7	25.4	12.3	764	27.5	71
CbII	7.1	25.7	11.5	735	31.7	73
CbII	7.2	25.1	12.1	703	33.6	74
CbII	7.3	24.2	11.9	696	33.6	71
CbII	7.4	22.8	12.6	698	33.8	69
CbII	7.5	22.5	14	719	30.6	72
CbII	7.6	25.8	14.6	738	26.3	69
CbII	7.7	25.4	14.7	786	24.2	64
CbII	7.8	26	14.9	812	24.5	53
CbII	7.9	26.6	15.5	799	24.5	55
CbII	8	27.4	15.6	795	25.9	56
CbII	8.1	22.5	15.6	765	26.9	59
CbII	8.2	23.1	16.3	745	27.9	62
CbII	8.3	24.4	16.4	774	27	71
CbII	8.4	24.8	16.8	818	25.2	71
CbII	8.5	23.8	16.1	816	24	73
CbII	8.6	24.8	16	830	25.3	68
CbII	8.7	22.9	15.6	807	23.7	70
CbII	8.8	19.7	14.1	733	27.9	68
CbII	8.9	18.1	14.4	730	29.1	64
CbII	9	17.7	14.4	722	32.9	65
CbII	9.1	20	14.6	722	30	66
CbII	9.2	20.6	14.5	757	30.4	62
CbII	9.3	22	15.2	800	28.3	61
CbII	9.4	21.2	14.2	744	29.1	68
CbII	9.5	22.3	14.1	745	27.1	63
CbII	9.6	19.3	14.2	728	29.6	63
CbII	9.7	19.6	15.3	706	28.9	64
CbII	9.8	21.4	16.7	682	26.9	68
CbII	9.9	22.9	17.8	733	26.4	51
CbII	10	22.9	20	764	25.4	46
CbII	10.1	25.5	20.8	785	26.7	48
CbII	10.2	25	20.6	804	27.9	51
CbII	10.3	23.2	21.3	834	28.7	44
CbII	10.4	22.4	21.8	843	27.4	55
CbII	10.5	23.1	21.6	824	27.2	57
CbII	10.6	22.1	23.1	897	23.1	53
CbII	10.7	24.3	23.6	919	23.4	48
CbII	10.8	27	24.2	952	24.3	56
CbII	10.9	31.1	26.3	965	23.1	51
CbII	11	32.3	27.2	1052	22.8	51
CbII	11.1	33.2	27.3	1004	23.8	49
CbII	11.2	34.4	28.4	1029	22.7	49
CbII	11.3	34	27.2	992	22.4	36
CbII	11.4	32.2	25.4	995	24.8	28
CbII	11.5	30.1	24.1	934	27.2	20
CbII	11.6	29	22.1	941	26.5	12
CbII	11.7	27.6	21.2	934	26.5	8
CbII	11.8	28.2	22.4	1029	25.8	6
CbII	11.9	27.2	24.5	1073	22.7	9
CbII	12	28.7	25.4	1104	21.3	10
CbII	12.1	30.9	27.2	1103	21.5	10
CbII	12.2	30.5	27.7	1057	20.4	5
CbII	12.3	28.1	26.5	959	19.1	3
CbII	12.4	28	23.2	850	21.4	0
CbII	12.5	28.2	23.1	844	20.4	0
CbII	12.6	26	22.7	811	20.3	0
CbII	12.7	27.5	27.1	914	19.2	7
CbII	12.8	29.7	31.4	1082	19	13
CbII	12.9	31.9	35.7	1209	19.4	14
CbII	13	30.9	36.1	1189	18.7	16
CbII	13.1	30.6	37	1273	17.8	20
CbII	13.2	30.9	32.3	1195	19.8	19
CbII	13.3	30	29.5	1086	23.1	13
CbII	13.4	30.5	27.1	1010	21.3	15
CbII	13.5	28.4	27.7	1022	21.2	22
CbII	13.6	34.3	27.2	1035	21.9	28
CbII	13.7	33	26.6	1071	22.4	38
CbII	13.8	31.5	24.3	996	23.1	59
CbII	13.9	28.5	20.7	988	27.3	72
CbII	14	28.1	16	931	31.6	72
CbIII	0	37	26.4	1188	17.8	50
CbIII	0.1	38.4	28.8	1174	18.7	47
CbIII	0.2	36.8	32	1352	21.4	53
CbIII	0.3	35.4	34.1	1314	19.6	58
CbIII	0.4	35.6	34.9	1391	18.2	62
CbIII	0.5	36.1	35.3	1420	19.2	61
CbIII	0.6	35.6	36.9	1426	18.6	63
CbIII	0.7	35.7	35.3	1368	20	53
CbIII	0.8	39	34.5	1437	21.1	43
CbIII	0.9	39.4	36.9	1427	20.7	41
CbIII	1	44.5	35.3	1698	20.6	41
CbIII	1.1	43.1	34.6	1690	20.1	46
CbIII	1.2	45	34.8	1612	19.1	54
CbIII	1.3	43.3	34.2	1590	19.4	59
CbIII	1.4	42.8	32.7	1679	18.9	58
CbIII	1.5	38.1	34.7	1456	17.6	54
CbIII	1.6	40.7	35.6	1759	17.9	44
CbIII	1.7	40.4	38.1	1851	17.5	43
CbIII	1.8	40.8	40.4	1822	16.5	40
CbIII	1.9	40.3	38	1692	19.6	35
CbIII	2	40.4	37.7	1615	21.7	34
CbIII	2.1	37.8	33.5	1259	23	39
CbIII	2.2	36.6	29.2	1109	24.2	40
CbIII	2.3	32.6	23.5	992	28.4	47
CbIII	2.4	31.4	22	921	28.7	55
CbIII	2.5	30.4	19.9	892	30.7	59
CbIII	2.6	29	18.8	845	31.8	64
CbIII	2.7	24.2	18.8	826	31.6	66
CbIII	2.8	25.9	18.1	841	31.7	68
CbIII	2.9	24.9	17.7	838	33	64
CbIII	3	24.1	18.3	811	32	64
CbIII	3.1	24.2	19.8	793	33.4	58
CbIII	3.2	24.5	19.4	787	32.9	58
CbIII	3.3	24.3	20.2	756	32.2	59
CbIII	3.4	23.2	19.7	715	31.6	56
CbIII	3.5	21.8	18.6	747	32.6	62
CbIII	3.6	22.5	17.2	802	30.2	68
CbIII	3.7	21.6	16	779	32.9	69
CbIII	3.8	21.5	15.5	809	29.7	67
CbIII	3.9	21.3	15.9	811	28.8	75
CbIII	4	22.9	14.4	746	31.1	70
CbIII	4.1	21.6	13.4	711	30.3	68
CbIII	4.2	23.7	12.4	689	29.8	71
CbIII	4.3	23.5	13.8	719	31	73
CbIII	4.4	23.2	13.8	724	31.4	66
CbIII	4.5	22.2	14.7	751	28.3	66
CbIII	4.6	21.6	15.1	759	30.7	66
CbIII	4.7	20	15.8	780	31.7	65
CbIII	4.8	19.2	13.7	739	32	63
CbIII	4.9	20.3	13	746	34	65
CbIII	5	19.9	13.4	759	33.5	68
CbIII	5.1	19.9	14.4	776	31.3	65
CbIII	5.2	21.7	16.4	836	27.1	60
CbIII	5.3	22.4	18.3	844	26.7	57
CbIII	5.4	22.4	18.6	818	24.8	59
CbIII	5.5	25	17.7	820	25.7	59
CbIII	5.6	24.8	17.1	795	28.1	66
CbIII	5.7	21.9	14.4	691	28.1	68
CbIII	5.8	22.2	13.7	696	27.1	69
CbIII	5.9	21.7	13.1	678	27.9	67
CbIII	6	19.6	14.4	688	26.8	65
CbIII	6.1	18.8	13.9	693	26.3	64
CbIII	6.2	21.6	14.6	753	29.4	67
CbIII	6.3	19.9	14.6	798	32.4	70
CbIII	6.4	18.6	15.2	838	31.8	71
CbIII	6.5	20	15.1	795	34.7	74
CbIII	6.6	20.6	15.3	790	34.5	76
CbIII	6.7	18.9	14.8	771	37.1	75
CbIII	6.8	18.3	14.4	692	35.7	76
CbIII	6.9	21.4	14.6	725	35.6	74
CbIII	7	22.8	15.4	763	31.3	71
CbIII	7.1	23.6	15.6	806	29.2	67
CbIII	7.2	24.2	16.1	787	28.3	62
CbIII	7.3	24.6	15.8	790	30.6	59
CbIII	7.4	22.8	16.3	787	29.7	62
CbIII	7.5	20.1	15.5	785	33.5	67
CbIII	7.6	22	15.9	748	33.4	69
CbIII	7.7	21.6	16.5	786	32.4	74
CbIII	7.8	21.4	16.7	802	31.3	76
CbIII	7.9	24.8	17.1	781	30.2	72
CbIII	8	27.9	16.4	776	30.3	69
CbIII	8.1	26.6	17.8	831	29.7	68
CbIII	8.2	28.3	17.9	841	26.9	61
CbIII	8.3	32.5	17.9	846	25.9	53
CbIII	8.4	33.7	17.4	920	25.8	58
CbIII	8.5	30.4	18.9	910	24.8	53
CbIII	8.6	29.1	18.1	849	26	52
CbIII	8.7	29.9	19	852	27.5	55
CbIII	8.8	30.3	20.6	909	28.8	54
CbIII	8.9	30.7	22.5	922	28.9	51
CbIII	9	30.8	24.1	1041	24.6	48
CbIII	9.1	34.7	25.6	1148	24.7	47
CbIII	9.2	33.3	27.8	1186	23.1	41
CbIII	9.3	31.7	30.2	1168	20.2	49
CbIII	9.4	30.7	31.7	1251	18.4	47
CbIII	9.5	31.8	31.5	1182	21.3	47
CbIII	9.6	32.5	32.4	1242	21.1	43
CbIII	9.7	34.3	33.1	1394	19.2	47
CbIII	9.8	35.8	33.1	1486	21.1	44
CbIII	9.9	36.2	31.7	1445	22	46
CbIII	10	39.2	31.1	1534	20.8	50
CbIII	10.1	39.5	32.1	1589	19.7	56
CbIII	10.2	40.6	31.3	1566	21.1	54
CbIII	10.3	41.9	32.8	1789	18.8	56
CbIII	10.4	42.7	34.9	1742	18.5	57
CbIII	10.5	45.2	34.8	1806	18.8	66
CbIII	10.6	46.1	34.2	1905	17.7	68
CbIII	10.7	47.6	35	1768	17.9	68
CbIII	10.8	43.8	34.6	1480	18.4	62
CbIII	10.9	42.6	34	1463	18.9	60
CbIII	11	40.3	36.3	1446	17	53
CbIII	11.1	35.7	35.5	1220	18.4	44
CbIII	11.2	31.6	32.1	1220	19	43
CbIII	11.3	31.2	25.6	1168	20.6	57
CbIII	11.4	29.9	21.8	1186	22.2	57
CbIII	11.5	29.7	19	1038	25.4	58
CbIII	11.6	31	17.4	1045	26.3	66
CbIII	11.7	32.6	20.6	1008	27.5	68
CbIII	11.8	37.8	25.8	1077	27.2	67
CbIII	11.9	39.3	27.9	1049	24.1	69
CbIII	12	38	28.3	1124	22.4	67
CbIII	12.1	41.6	29.5	1172	21.1	60
CbIII	12.2	43.7	27.9	1288	18	60
CbIII	12.3	41.6	27.9	1322	15.7	58
CbIII	12.4	39.1	29.2	1350	16.6	54
CbIII	12.5	43.5	30.2	1426	17.9	60
CbIII	12.6	41.9	29.7	1394	17.6	64
CbIII	12.7	41	28.7	1396	19.8	57
CbIII	12.8	39.5	24.5	1338	22.5	52
CbIII	12.9	38.4	20.3	1294	23.7	58
CbIII	13	30.3	16.5	1199	23.7	56
CbIV	0	30.3	16.2	943	27.1	62
CbIV	0.1	30.9	17.4	972	25.8	62
CbIV	0.2	31.4	17.9	1024	26.3	62
CbIV	0.3	31.3	18.3	1097	23.8	57
CbIV	0.4	31.5	19.3	1116	20.2	51
CbIV	0.5	31.8	22.8	1148	14.7	29
CbIV	0.6	32.5	22.9	1096	14.7	41
CbIV	0.7	36.1	22.4	1121	16.2	43
CbIV	0.8	33.9	23.2	981	17.5	40
CbIV	0.9	37.2	24.1	1119	18.9	39
CbIV	1	38.3	23.9	1108	19.8	37
CbIV	1.1	34.9	22.6	1051	19.3	24
CbIV	1.2	33.1	23.6	1043	19.9	22
CbIV	1.3	32.1	23.4	1051	20.1	23
CbIV	1.4	29.4	23.7	1067	21.2	32
CbIV	1.5	31	23.8	1154	21.3	37
CbIV	1.6	29.8	22.2	1200	21	42
CbIV	1.7	30.4	20.7	1155	21.3	46
CbIV	1.8	29.7	19.5	1130	23.5	39
CbIV	1.9	28.3	18.8	968	21.9	31
CbIV	2	24.5	18	875	21.7	28
CbIV	2.1	26.6	19.9	916	22.2	31
CbIV	2.2	25.7	21.7	995	20.2	33
CbIV	2.3	27.5	23.1	1038	16.9	40
CbIV	2.4	31.9	23.8	1056	18.5	34
CbIV	2.5	33.5	24.7	1048	18.4	33
CbIV	2.6	29.5	23.6	956	17.5	31
CbIV	2.7	31.1	24.1	936	19.5	25
CbIV	2.8	31.8	23.3	915	18.5	28
CbIV	2.9	30.1	24.1	996	15.6	34
CbIV	3	32.3	23.2	1041	15.9	37
CbIV	3.1	35.3	22.6	1047	18.6	32
CbIV	3.2	30.8	21.7	1006	17.1	35
CbIV	3.3	30	21	1056	19.6	30
CbIV	3.4	31.7	19.1	955	22	28
CbIV	3.5	31.5	19	960	22	36
CbIV	3.6	31.9	19.5	980	19.9	45
CbIV	3.7	36	19.3	986	18.9	51
CbIV	3.8	36.9	19.6	945	16.8	62
CbIV	3.9	35.7	19.8	963	17.6	74
CbIV	4	37.3	20.2	941	19.2	69
CbIV	4.1	37.5	20.1	904	19.9	69
CbIV	4.2	36.1	18.6	863	21.9	64
CbIV	4.3	33.9	17.1	827	25	66
CbIV	4.4	29.7	15.8	786	28.1	68
CbIV	4.5	25.3	13.4	721	32.4	68
CbIV	4.6	23.8	12.1	712	34.1	72
CbIV	4.7	22.8	11.6	685	34.9	76
CbIV	4.8	24.3	12.8	688	35.1	77
CbIV	4.9	26.6	13.3	685	33.5	71
CbIV	5	25.9	13.5	730	30.5	78
CbIV	5.1	24.8	13.9	706	31.4	64
CbIV	5.2	23.8	14.1	718	33.6	63
CbIV	5.3	20.1	13.2	738	33.1	62
CbIV	5.4	19.1	11.8	717	35	67
CbIV	5.5	18.4	11.5	673	36.1	65
CbIV	5.6	18.9	10.5	695	36.9	76
CbIV	5.7	19.1	10.3	716	34.7	78
CbIV	5.8	17.6	10.1	712	34.1	77
CbIV	5.9	17.4	10.6	733	32.9	65
CbIV	6	17.8	12.8	766	31	62
CbIV	6.1	16.8	13.1	784	29	56
CbIV	6.2	16.4	13.5	761	29.7	51
CbIV	6.3	17.1	13.7	750	29.6	52
CbIV	6.4	17	14.5	772	30.2	53
CbIV	6.5	17.6	13.3	768	31	52
CbIV	6.6	19.3	14	782	30.5	55
CbIV	6.7	21.5	14.3	776	30.7	49
CbIV	6.8	24.3	14.7	802	30.7	43
CbIV	6.9	25.5	15.3	812	27.1	46
CbIV	7	26.1	15.7	819	27.3	46
CbIV	7.1	25	15.6	763	29.5	46
CbIV	7.2	24.7	15.2	785	28	57
CbIV	7.3	23.7	14	724	31	66
CbIV	7.4	22.9	13.5	697	34.4	69
CbIV	7.5	22.1	12.4	690	33.5	70
CbIV	7.6	22.3	12.1	737	33.3	67
CbIV	7.7	21.9	13.8	735	33.4	63
CbIV	7.8	22.8	15.3	795	30.3	57
CbIV	7.9	24.5	16.6	803	25.6	49
CbIV	8	26.3	17	848	25.5	42
CbIV	8.1	28.9	18.9	838	22.1	38
CbIV	8.2	29.8	18	840	19.1	34
CbIV	8.3	31.3	18.8	877	19.3	42
CbIV	8.4	29.8	17.4	889	18.8	42
CbIV	8.5	29.5	18.7	846	15.4	45
CbIV	8.6	28.5	18.1	847	16.2	48
CbIV	8.7	30.1	18.9	874	16.5	57
CbIV	8.8	29.8	18.3	875	15.7	45
CbIV	8.9	31.5	18.9	851	17	46
CbIV	9	31	20.9	901	19.2	45
CbIV	9.1	29.9	20.6	917	20.9	47
CbIV	9.2	25.5	19.9	885	25.6	54
CbIV	9.3	25.2	19.7	831	29	65
CbIV	9.4	22.4	19.5	828	32.6	69
CbIV	9.5	26	16.1	767	32.7	72
CbIV	9.6	26.3	14.7	726	34.1	74
CbIV	9.7	26.7	14.8	727	34.1	71
CbIV	9.8	27.1	14.6	757	31.8	62
CbIV	9.9	29.3	15.1	803	29.1	60
CbIV	10	23.7	15	817	30.8	58
CbIV	10.1	25.2	15.7	840	30.2	60
CbIV	10.2	27.4	16.4	903	26.6	61
CbIV	10.3	26.2	15.8	872	29.9	66
CbIV	10.4	27.5	17	910	28.8	67
CbIV	10.5	28.8	17.5	891	31	71
CbIV	10.6	26.2	17.7	889	29	66
CbIV	10.7	23.7	16	832	30.5	63
CbIV	10.8	23.9	17	864	26.5	61
CbIV	10.9	22.1	14.6	794	28.9	61
CbIV	11	22.8	16	846	26.2	49
CbIV	11.1	29.1	17.9	889	24.5	48
CbIV	11.2	30.6	20.3	944	22.8	45
CbIV	11.3	31.2	20.3	966	22.2	45
CbIV	11.4	30.4	22.9	997	20.7	39
CbIV	11.5	30.1	23.8	1018	18.6	42
CbIV	11.6	26.1	22.8	1000	23	44
CbIV	11.7	26.5	21.6	973	24.8	44
CbIV	11.8	24.8	23	987	25.6	51
CbIV	11.9	28.2	23.4	1069	24.2	52
CbIV	12	32.5	22.5	1016	24.9	56
CbIV	12.1	30.9	23.1	1039	20.2	54
CbIV	12.2	32	25	1037	17.5	54
CbIV	12.3	33.7	26.2	1146	16.9	43
CbIV	12.4	31.7	26.4	1116	15.7	41
CbIV	12.5	30.7	27.6	1180	15.6	33
CbIV	12.6	31.3	26.5	1179	21	23
CbIV	12.7	32.1	29.3	1236	21.1	21
CbIV	12.8	33.8	30.5	1197	20.6	18
CbIV	12.9	34.5	32.7	1266	21.5	19
CbIV	13	35.5	35.6	1606	20.6	22
CbIV	13.1	40.6	40.2	1723	16.5	39
CbIV	13.2	41.9	39.9	2011	17	38
CbIV	13.3	43.7	38.9	2150	17.1	51
CbIV	13.4	46	38.7	2274	16.2	55
CbIV	13.5	43.3	37.3	2087	15.8	56
CbIV	13.6	42.8	35.7	2233	15.4	58
CbIV	13.7	42.4	33	2011	15.2	59
CbIV	13.8	41.6	34	1909	14.4	55
CbIV	13.9	36.8	31.4	1878	14.7	56
CbIV	14	38.8	31.4	1786	15.1	55
CbIV	14.1	37	31	1660	16.6	58
CbIV	14.2	35.7	31.6	1553	18.2	58
CbIV	14.3	34.4	29.4	1415	20.4	54
CbIV	14.4	36.3	29.2	1279	23.3	54
CbIV	14.5	34.7	24.5	1228	25.1	57
CbIV	14.6	31.3	20.2	1063	26.9	55
CbIV	14.7	29.5	17.8	1023	27.7	57
CbV	0	19.1	12.4	749	37.2	59
CbV	0.1	21.6	12.3	789	36.9	50
CbV	0.2	24.6	15.3	876	32.4	42
CbV	0.3	26.5	18	930	31.8	41
CbV	0.4	27.8	20.1	1000	27.7	42
CbV	0.5	27.7	21.9	991	26.4	37
CbV	0.6	28.2	23	1005	25.8	40
CbV	0.7	26	22.6	982	26.9	47
CbV	0.8	25.3	22.2	963	28.2	56
CbV	0.9	23.3	21	893	28.5	55
CbV	1	23.6	19.1	874	30	50
CbV	1.1	23	20	846	30.7	42
CbV	1.2	23.8	19	822	33.6	26
CbV	1.3	24.7	20	871	32.4	19
CbV	1.4	26.9	23	926	31.9	21
CbV	1.5	28.6	23.9	917	31.3	26
CbV	1.6	29.8	23	908	31.6	29
CbV	1.7	31.1	26	951	25.6	46
CbV	1.8	30.7	26.8	935	25	51
CbV	1.9	33.1	27.8	963	24.4	48
CbV	2	34.1	28.5	1018	23.4	49
CbV	2.1	33.3	31.5	1171	21.3	44
CbV	2.2	32.5	32.2	1213	22.5	39
CbV	2.3	32.1	32.4	1274	22.8	31
CbV	2.4	29.6	29	1240	24	27
CbV	2.5	26.4	27.6	1191	22.5	22
CbV	2.6	24.9	24.6	1083	24.1	23
CbV	2.7	24.4	22.4	1021	25.5	15
CbV	2.8	27.3	22.1	1032	25.9	11
CbV	2.9	28	22.9	1035	27.7	7
CbV	3	27.9	24	1036	29.3	8
CbV	3.1	29.9	25.6	1079	26.8	14
CbV	3.2	30.2	26	1075	25.1	20
CbV	3.3	30.5	26.7	1014	24.8	19
CbV	3.4	30.4	26.6	1004	24.5	20
CbV	3.5	32.7	24.9	1053	24.6	19
CbV	3.6	32.3	22.5	1029	26.8	13
CbV	3.7	33	20.2	985	31.4	10
CbV	3.8	30.6	16.4	921	32.8	11
CbV	3.9	30.6	15	955	32.3	11
CbV	4	28.8	15.8	910	33.7	11
CbV	4.1	27.4	16.4	904	33.8	13
CbV	4.2	24.8	17.8	925	30.9	14
CbV	4.3	24.2	22.3	1024	27.5	14
CbV	4.4	26	24.9	1112	25.5	23
CbV	4.5	26.8	25.8	1122	24.1	28
CbV	4.6	29.1	26.2	1109	22.8	28
CbV	4.7	29.3	26.5	1109	22.2	33
CbV	4.8	30	22.6	991	25.8	38
CbV	4.9	24.9	19.5	846	27.9	35
CbV	5	24.2	16.5	820	29.3	43
CbV	5.1	21.9	15.9	782	31.4	52
CbV	5.2	24.6	15.7	787	31.2	57
CbV	5.3	24.6	15.2	782	33.1	59
CbV	5.4	26.1	14.7	769	30.8	66
CbV	5.5	24.7	14.5	749	31.6	59
CbV	5.6	25.8	14.5	756	29.3	56
CbV	5.7	24	13.6	758	33.1	54
CbV	5.8	23	13.8	801	30.1	54
CbV	5.9	23	14	778	33.4	55
CbV	6	23.6	15.5	828	30.9	61
CbV	6.1	23.3	14.5	818	35	60
CbV	6.2	24.6	14.9	842	29.9	64
CbV	6.3	24.5	14.5	822	30.8	66
CbV	6.4	25.1	14.8	896	30	61
CbV	6.5	24.5	14.3	863	31.4	60
CbV	6.6	22.8	13.1	864	27.7	63
CbV	6.7	21.2	11.4	808	31.7	60
CbV	6.8	21.3	11.9	816	29.6	60
CbV	6.9	21.2	11.3	761	28.9	62
CbV	7	20.4	10.1	745	28.8	64
CbV	7.1	20.3	11	716	30.2	66
CbV	7.2	22.7	11.2	720	29.3	69
CbV	7.3	21.8	10	709	29.1	69
CbV	7.4	21.5	10.2	730	29.3	72
CbV	7.5	22.2	11.3	737	30.1	71
CbV	7.6	23	10.9	774	31	74
CbV	7.7	20.1	11.3	798	30.9	74
CbV	7.8	20.9	12.3	800	32.5	76
CbV	7.9	21	11.9	743	33.2	77
CbV	8	20.9	11.5	711	34.9	79
CbV	8.1	21.3	12.3	720	31.4	68
CbV	8.2	23.2	12	690	31.5	58
CbV	8.3	23.3	12.3	667	31.4	53
CbV	8.4	24.9	11.5	714	28.3	49
CbV	8.5	25.9	11.7	730	27.7	54
CbV	8.6	25.4	11.2	677	31.3	64
CbV	8.7	23.8	11.6	729	31.3	68
CbV	8.8	23.2	12.1	772	30.2	70
CbV	8.9	22.7	13.4	741	32.5	72
CbV	9	22.2	11.7	691	35.6	62
CbV	9.1	21.8	10.9	700	35.4	55
CbV	9.2	20.9	10.8	651	35.5	61
CbV	9.3	21.6	9.2	622	35.5	58
CbV	9.4	19.9	9.5	638	35.8	53
CbV	9.5	19.6	10.7	695	31.3	59
CbV	9.6	18.6	10.5	699	31.2	60
CbV	9.7	19.6	10.4	699	32.7	57
CbV	9.8	19.2	10.5	735	33.4	56
CbV	9.9	19.2	9.5	720	35.5	55
CbV	10	21.9	9.7	745	35.2	58
CbV	10.1	22.6	10.1	771	33.8	58
CbV	10.2	22.4	10.3	769	31.8	56
CbV	10.3	23.9	10.5	725	33.1	57
CbV	10.4	23.6	10.9	744	29	61
CbV	10.5	22.3	11.7	755	27.7	57
CbV	10.6	23.4	13	731	28.4	65
CbV	10.7	23.7	14.1	719	26.9	71
CbV	10.8	22.2	15.2	750	25.2	72
CbV	10.9	23.8	16.6	767	27.2	68
CbV	11	27	17.6	804	27.4	68
CbV	11.1	26.5	17.2	811	28	62
CbV	11.2	27.7	18.2	854	29.8	53
CbV	11.3	28	18.4	874	30.8	54
CbV	11.4	27.8	17	858	30.6	52
CbV	11.5	24.8	16.5	792	31.6	55
CbV	11.6	27.4	18.9	806	28.4	56
CbV	11.7	25.5	18.2	818	26.7	64
CbV	11.8	23.1	19.3	843	24	67
CbV	11.9	22.8	20.4	852	23.4	55
CbV	12	22.1	20.5	856	25.2	40
CbV	12.1	20.5	20.2	882	27.3	36
CbV	12.2	23.7	21.4	852	25.9	30
CbV	12.3	27.3	21.9	852	28	23
CbV	12.4	27.6	23	870	26.4	28
CbV	12.5	28.1	24.5	898	23.4	34
CbV	12.6	29.8	24.8	879	23.4	26
CbV	12.7	27	23.5	892	27.5	21
CbV	12.8	25.5	21.1	823	28.1	15
CbV	12.9	25.1	19.8	824	30.4	9
CbV	13	24	18.8	890	30	7
CbV	13.1	21.2	19.3	911	28.6	5
CbV	13.2	22.4	19.7	938	25.9	6
CbV	13.3	22.9	21.1	983	24.7	8
CbV	13.4	23.8	22.6	975	23.7	15
CbV	13.5	25.6	22.4	925	26	16
CbV	13.6	28.1	22.7	1079	25.8	21
CbV	13.7	28.2	23.5	1057	25	23
CbV	13.8	29	23.8	1034	24.1	23
CbV	13.9	29.6	23.9	1099	23.1	17
CbV	14	31.4	25.7	1134	22	17
CbV	14.1	33	26	1080	21.8	23
CbV	14.2	37.1	27.2	1289	21.8	25
CbV	14.3	37.3	26.5	1257	23	24
CbV	14.4	37	26.5	1178	23.3	23
CbV	14.5	33.6	26	1083	21.4	20
CbV	14.6	32.6	24	986	23.1	19
CbV	14.7	33.4	23.8	817	22.8	29
CbV	14.8	33	25.5	896	21.3	42
CbV	14.9	34.1	26	965	21.6	60
CbV	15	37.2	26.3	1099	22.6	73
CbV	15.1	36.5	27.3	1086	22.5	71
CbV	15.2	29.3	25	1066	24.1	73
CbV	15.3	29.6	21.7	1077	26.3	72
CbV	15.4	29.4	17.7	1007	26.2	63
CbV	15.5	30	17.3	915	25.7	0
CbX	0	27.8	9.9	724	28.3	74
CbX	0.1	27.5	10.6	758	28.5	69
CbX	0.2	23.4	10.4	766	23.6	62
CbX	0.3	25.6	9	762	22.2	56
CbX	0.4	23.8	9	767	20	53
CbX	0.5	22.8	7.8	748	20	54
CbX	0.6	23	5.4	731	19.8	67
CbX	0.7	27.4	4.6	736	22.6	66
CbX	0.8	23.8	5.8	764	23.2	60
CbX	0.9	24.9	6.6	775	24	51
CbX	1	24.2	7	779	25	46
CbX	1.1	26	8.2	784	25.8	35
CbX	1.2	24	8.5	805	26	35
CbX	1.3	24.4	8.6	825	23.3	40
CbX	1.4	24.4	8.5	851	24.2	51
CbX	1.5	25.9	9.6	859	22.6	50
CbX	1.6	23.6	10.1	842	21.4	54
CbX	1.7	25.6	13.4	856	19.7	47
CbX	1.8	28.3	14.5	866	19.9	43
CbX	1.9	27.7	14.8	859	18.5	36
CbX	2	29.7	16.7	882	19.5	38
CbX	2.1	31.2	18.9	968	19.2	28
CbX	2.2	29.9	18.8	963	21.8	35
CbX	2.3	28.5	17.8	922	23.4	29
CbX	2.4	30.6	18.4	932	22.8	32
CbX	2.5	27.8	17.3	904	22.1	35
CbX	2.6	27.9	16.7	838	21.7	43
CbX	2.7	28.6	15.3	810	22.7	42
CbX	2.8	30.1	16.6	829	20.8	53
CbX	2.9	31.5	17.1	806	23.8	57
CbX	3	31.8	17.5	822	26	56
CbX	3.1	32.4	16	841	27	60
CbX	3.2	33	15.8	847	25.6	63
CbX	3.3	33.9	15.6	861	26.1	61
CbX	3.4	30.6	14.8	824	25.5	51
CbX	3.5	29.7	14.3	835	24.3	51
CbX	3.6	27.9	15.7	828	22.8	48
CbX	3.7	29.2	15.4	854	21	42
CbX	3.8	27.8	14.9	812	21.1	47
CbX	3.9	29.2	15.4	858	19.2	64
CbX	4	31.8	16.2	881	18.5	67
CbX	4.1	32.3	15.5	872	19	62
CbX	4.2	29.9	17	867	19.6	54
CbX	4.3	29.2	17.8	874	21.1	47
CbX	4.4	30.8	18.5	841	20.3	44
CbX	4.5	30	19.1	836	20.3	40
CbX	4.6	28.6	19.3	786	23.1	49
CbX	4.7	28.6	18.9	776	22.8	53
CbX	4.8	28.9	19	777	23.2	59
CbX	4.9	28.7	17.8	809	26.1	53
CbX	5	28.1	17	785	26.9	54
CbX	5.1	30.4	17.7	836	24.9	49
CbX	5.2	32.5	18.2	877	24.6	51
CbX	5.3	31.1	17.9	878	23.6	49
CbX	5.4	30.8	18.4	862	21.9	47
CbX	5.5	30.1	18.7	846	22.6	46
CbX	5.6	30.9	18.1	871	22.8	43
CbX	5.7	31.3	18.7	849	24.3	50
CbX	5.8	32.2	18.9	856	23.9	47
CbX	5.9	30.4	18.8	879	22.4	50
CbX	6	30.6	18.2	893	19.9	54
CbX	6.1	30.2	18	879	19.6	65
CbX	6.2	27.3	18.1	880	18	58
CbX	6.3	29.9	18.2	858	17.1	59
CbX	6.4	32.5	18	828	18.5	54
CbX	6.5	32	18.6	813	19.1	55
CbX	6.6	29.8	18.5	805	18.1	52
CbX	6.7	32.3	17	770	18.3	57
CbX	6.8	28.4	18.4	810	18.3	54
CbX	6.9	27.5	19.5	814	16.7	44
CbX	7	28.2	21.3	809	16	29
CbX	7.1	29.1	20.9	766	16.4	14
CbX	7.2	25.4	20.9	763	16.3	7
CbX	7.3	26.3	18.1	738	17	21
CbX	7.4	24.5	16.9	722	18.2	27
CbX	7.5	23.4	13.5	737	20.3	41
CbX	7.6	21.2	13.1	774	21.1	49
CbX	7.7	23.3	12	760	21.8	51
CbX	7.8	23.1	12.1	751	22.4	51
CbX	7.9	22.6	12.2	886	23.4	54
CbX	8	24	12.1	895	21.5	52
CbX	8.1	27.3	11.4	891	22	63
CbX	8.2	29	12.2	929	22.9	63
CbX	8.3	29.1	11.4	947	22.8	65
CbX	8.4	28.6	10.4	843	21.5	65
CbX	8.5	28.1	10.5	839	21.5	66
CbX	8.6	28.2	10.9	829	19.3	52
CbX	8.7	26.3	9.9	830	18.5	49
CbX	8.8	28.6	10.5	803	20	48
CbX	8.9	30.2	12.3	770	19.8	41
CbX	9	29.8	14.3	762	19.9	28
CbX	9.1	26.3	13.2	776	21	35
CbX	9.2	26	13.3	785	20.7	39
CbX	9.3	23.8	13.3	791	20.9	32
CbX	9.4	23.5	11	810	22.7	50
CbX	9.5	23.5	8.5	817	22.8	63
CbX	9.6	23.9	9.5	802	24.9	65
CbX	9.7	25.2	8.6	767	26.2	65
CbX	9.8	23.8	8.1	761	24.4	71
CbX	9.9	24.2	7.9	734	25.2	66
CbX	10	27.1	7.2	685	28.3	62
CbX	10.1	29.2	7.2	672	27.4	62
CbX	10.2	27	7.5	647	30.3	66
CbX	10.3	27.4	7.6	649	31.6	66
CbX	10.4	28.4	7.9	712	30.2	62
CbX	10.5	25.1	8.7	748	26	65
CbX	10.6	23.8	8.9	780	24.9	69
CbX	10.7	24.1	8.6	792	21.5	59
CbX	10.8	26.3	8.1	801	19.6	59
CbX	10.9	23.8	8.2	771	20.6	71
CbX	11	22.4	9.2	792	22.6	65
CbX	11.1	20.9	9.5	792	23.2	58
CbX	11.2	21.1	9.5	813	23.6	62
CbX	11.3	19.4	10.5	823	26.2	60
CbX	11.4	22.2	10.2	820	25.2	57
CbX	11.5	25.5	9.1	819	25.3	61
CbX	11.6	27.8	7.9	775	26.2	64
CbX	11.7	27.9	8.3	773	27.4	60
CbX	11.8	29.3	7.5	784	25.7	61
CbX	11.9	26.8	7.8	757	25.7	63
CbX	12	24.5	8.3	772	26.6	59
CbX	12.1	23.9	9.3	781	27.2	60
CbX	12.2	23.6	9.8	793	24.6	63
CbX	12.3	23.1	12.1	746	23.4	55
CbX	12.4	23.1	12.4	772	24.4	51
CbX	12.5	24.5	12.5	735	24.6	53
CbX	12.6	25	12.5	767	22.2	47
CbX	12.7	24.9	14.1	764	22.2	47
CbX	12.8	25.1	13.1	798	22.2	48
CbX	12.9	24.8	15.4	816	19.5	43
CbX	13	28	20.3	1059	18.9	29
CbX	13.1	26.7	21.1	1050	19.2	30
CbX	13.2	28.4	18.6	1037	19.5	25
CbX	13.3	27.8	18.4	1036	19.8	27
CbX	13.4	27.1	16.2	996	21.6	32
CbX	13.5	22.3	11.2	745	20.4	52
CbX	13.6	22.4	12.7	755	19.4	47
CbX	13.7	22.7	13.3	769	19.6	49
CbX	13.8	23.4	12.9	766	21.3	43
CbX	13.9	24.3	12.7	765	18.9	41
CbX	14	27.3	12.4	772	19.6	35
CbX	14.1	27.8	11.7	751	19.7	42
CbX	14.2	26.1	12.6	719	19.5	39
CbX	14.3	28.6	12.6	700	18.3	48
CbX	14.4	28.6	13.4	672	20.2	40
CbX	14.5	27.2	15.3	683	18.2	38
CbX	14.6	30.5	15	690	18	35
CbX	14.7	30.7	16.1	714	16.8	38
CbX	14.8	27.9	19.8	751	16.5	37
CbX	14.9	28	20.7	783	16.4	41
CbX	15	26.5	20.4	757	17.6	34
CbX	15.1	24.5	21.8	854	19.5	24
CbX	15.2	25.6	21.4	892	20.1	17
CbX	15.3	28	20.2	881	20.8	15
CbX	15.4	29.3	21.4	892	20.4	19
CbX	15.5	30.4	21.2	938	19.9	20
CbX	15.6	26.7	21.4	864	18.6	25
CbX	15.7	24.6	21.2	847	19.1	26
CbX	15.8	22.9	19.5	834	17.5	29
CbX	15.9	25.6	18.2	831	18.4	30
CbX	16	25.6	18.4	828	19	42
CbX	16.1	27	17.9	816	19.9	48
CbX	16.2	29.3	17.8	779	21.2	55
CbX	16.3	28.8	19.3	902	22.1	53
CbX	16.4	24	19.8	913	20.8	57
CbX	16.5	23.8	19.5	924	22.4	52
CbX	16.6	26	19.1	903	23.9	43
CbX	16.7	24.6	19.4	895	22.2	35
CbX	16.8	24.9	18.8	759	23.2	31
CbX	16.9	24.5	19.3	751	24.2	32
CbX	17	25	19.9	739	22.9	34
CbX	17.1	24.1	19	733	21	41
CbX	17.2	26.4	19.3	756	21.2	52
CbX	17.3	26	19.3	780	21.9	62
CbX	17.4	28	17.8	812	20.3	60
CbX	17.5	28.7	17.7	779	19.3	65
CbX	17.6	27.4	17.1	790	20	72
CbX	17.7	26.5	15.5	788	21.2	76
CbX	17.8	26.4	14.7	791	20.9	74
CbX	17.9	26.5	15.3	763	23.2	71
CbX	18	27	16.3	762	25.1	75
CbX	18.1	29.6	17.8	772	25.8	79
CbX	18.2	27.3	20.1	773	24.1	71
CbX	18.3	28.1	22.3	786	21.7	63
CbX	18.4	27.3	23	834	19.8	59
CbX	18.5	25.9	23.4	859	18.9	35
CbX	18.6	25.8	23.3	833	17.4	18
CbX	18.7	28.4	22.4	855	19.7	31
CbX	18.8	29.9	20.7	881	20.1	40
CbX	18.9	32.4	19.4	841	21	50
CbX	19	32.6	18.8	824	19.6	62
CbX	19.1	32.7	19.2	837	18.9	67
CbX	19.2	30.9	19.3	823	17	62
CbX	19.3	30.3	18.9	787	18.6	58
CbX	19.4	29.5	20.1	807	20.1	48
CbX	19.5	33.6	20	787	20.1	36
CbX	19.6	33.7	18.9	786	21.6	22
CbX	19.7	37.1	18.9	778	22	25
CbX	19.8	35.2	21.2	790	21.2	19
CbX	19.9	34	21.7	779	19.6	10
CbX	20	29.3	22.1	789	20.3	14
CbX	20.1	26.1	23.4	808	18.5	0
